# Supplementary material for: Creation and validation of the first infinium DNA methylation array for the human imprintome
Source: Springer Nature journal article supplement (doi:10.1186/s43682-024-00028-6), 2024-07-10
Supplement: 43682_2024_28_MOESM1_ESM.pdf [file 43682_2024_28_MOESM1_ESM.pdf]

# Creation and Validation of the First Infinium DNA Methylation Array for the Human Imprintome

Additional File 2

Natalia Carreras-Gallo<sup>1</sup>, Varun B. Dwaraka<sup>1</sup>, Dereje D. Jima<sup>2,3</sup>, David A. Skaar<sup>2,4,5</sup>, Tavis L. Mendez<sup>1</sup>, Antonio Planchart<sup>2,4,5</sup>, Wanding Zhou<sup>6,7</sup>, Randy L. Jirtle<sup>2,4,5</sup>, Ryan Smith<sup>1</sup>, Cathrine Hoyo<sup>2,4,5</sup>

<sup>1</sup> TruDiagnostic, Inc., Lexington, KY USA

<sup>2</sup> Center for Human Health and the Environment, North Carolina State University, Raleigh, NC, USA

<sup>3</sup> Bioinformatics Research Center, North Carolina State University, Raleigh, NC, USA

<sup>4</sup> Toxicology Program, North Carolina State University, Raleigh, NC, USA

<sup>5</sup> Department of Biological Sciences, North Carolina State University, Raleigh, NC, USA

<sup>6</sup> Center for Computational and Genomic Medicine, Children's Hospital of Philadelphia, Philadelphia, PA, USA

<sup>7</sup> Department of Pathology and Laboratory Medicine, University of Pennsylvania, Philadelphia, PA, USA

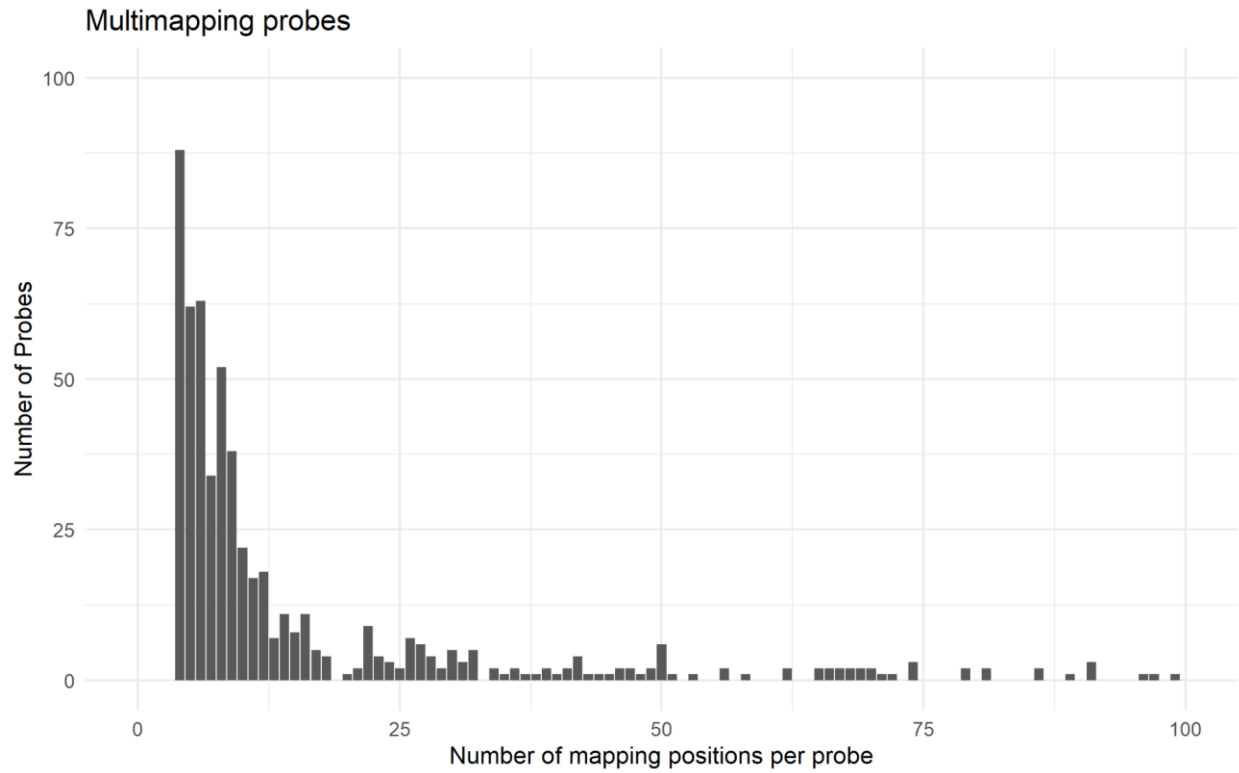

**Fig. S1** Number of mapping positions per multimapper probe in the Imprintome array. A total of 1,313 probes are multimapper and the minimum of genomic positions where they map is 2 and the maximum is 100.

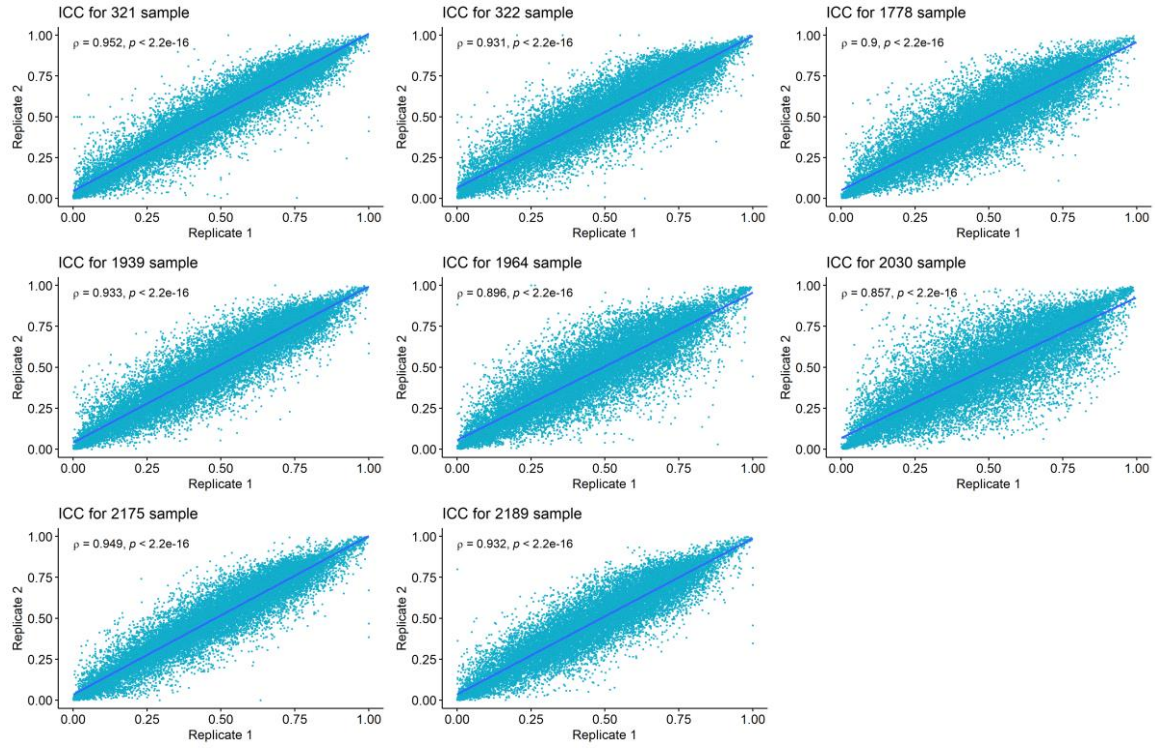

**Fig. S2** Intraclass correlation (ICC) values for 8 umbilical cord blood replicate samples.

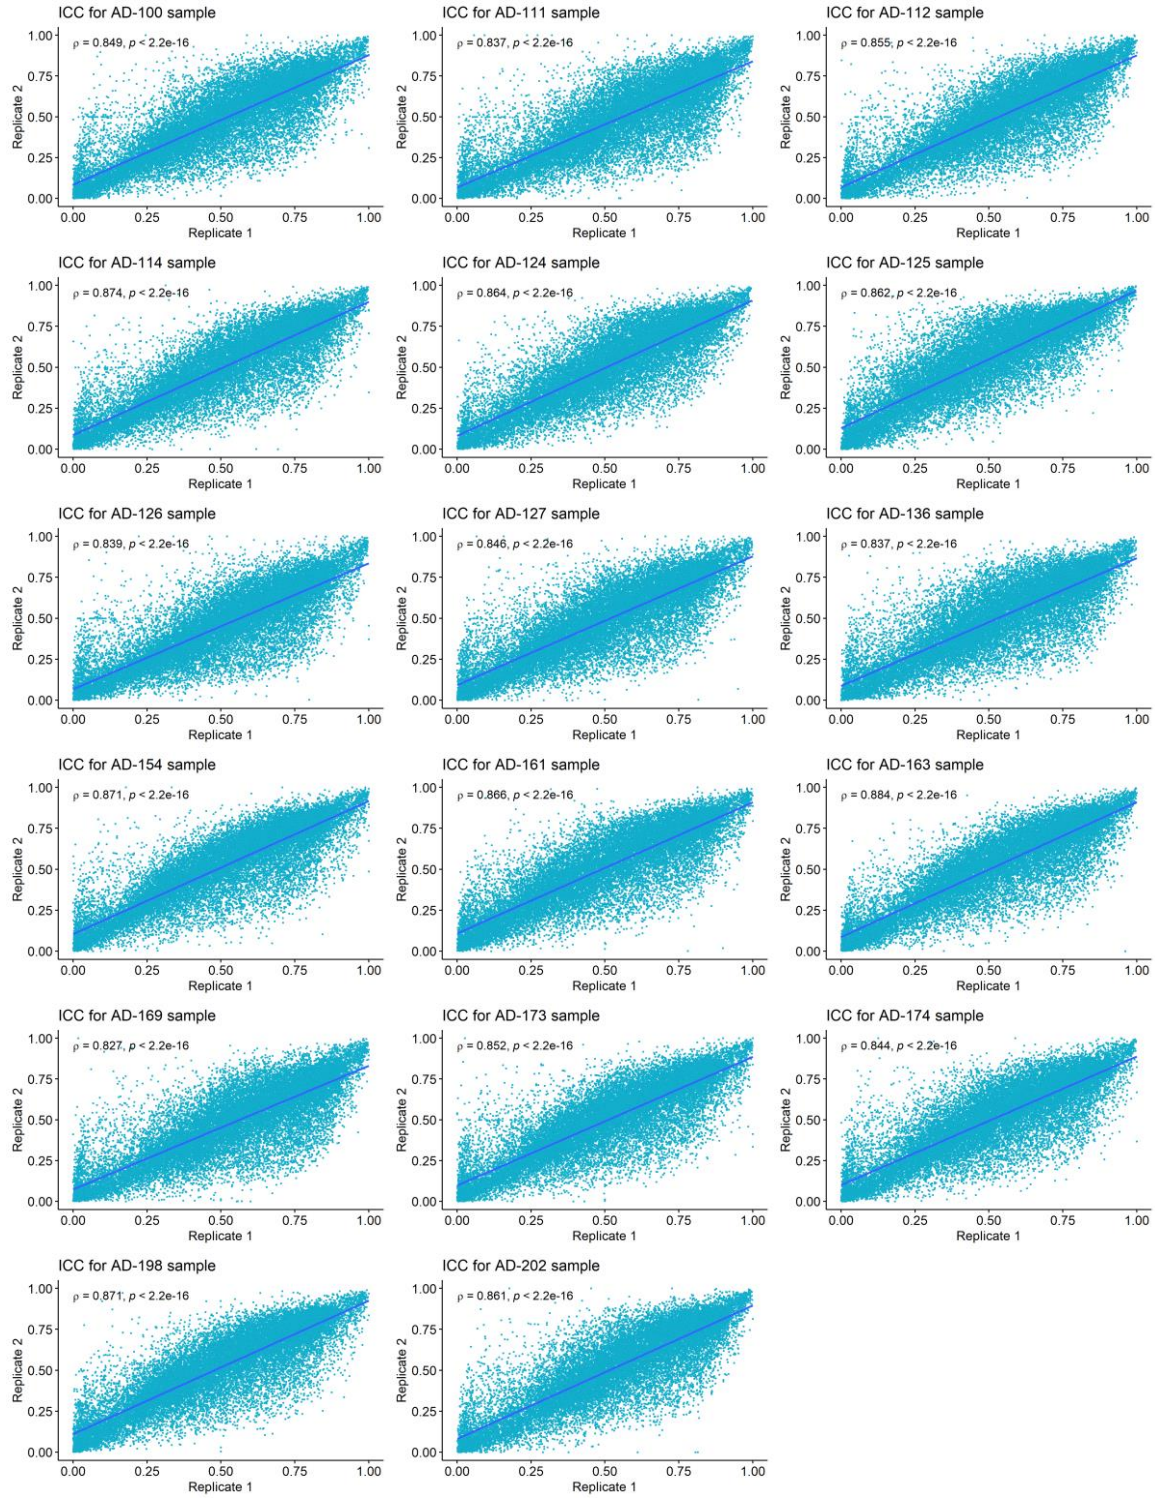

**Fig. S3** Intraclass correlation (ICC) values for 17 whole blood replicate samples.
